# Supplementary material for: Glycans Flanking the Hypervariable Connecting Peptide between the A and B Strands of the V1/V2 Domain of HIV-1 gp120 Confer Resistance to Antibodies That Neutralize CRF01_AE Viruses
Source: PLOS journal article supplement (doi:10.1371/journal.pone.0119608), 2015-03-20
Supplement: S1 (10.1371/journal.pone.0119608.s001) [file journal.pone.0119608.s001]

| <b>Supplemental Table S1. Neutralization sensitivity of pseudovirus constructed with envelopes from subject 107747</b>                                                                                                                                                                                                                                                                                                                                                                                                                                       |                                                                        |                |                |             |
|--------------------------------------------------------------------------------------------------------------------------------------------------------------------------------------------------------------------------------------------------------------------------------------------------------------------------------------------------------------------------------------------------------------------------------------------------------------------------------------------------------------------------------------------------------------|------------------------------------------------------------------------|----------------|----------------|-------------|
|                                                                                                                                                                                                                                                                                                                                                                                                                                                                                                                                                              | <b>Neutralization titer (IC<sub>50</sub>) obtained with HIV+ serum</b> |                |                |             |
| <b>Clone / Serum</b>                                                                                                                                                                                                                                                                                                                                                                                                                                                                                                                                         | <b>T500105</b>                                                         | <b>T500107</b> | <b>T500208</b> | <b>Z23</b>  |
| <b>016</b>                                                                                                                                                                                                                                                                                                                                                                                                                                                                                                                                                   | <b>47</b>                                                              | <b>4144</b>    | <b>417</b>     | <100        |
| <b>041</b>                                                                                                                                                                                                                                                                                                                                                                                                                                                                                                                                                   | <40                                                                    | <b>1260</b>    | <b>136</b>     | <100        |
| <b>048 wtS</b>                                                                                                                                                                                                                                                                                                                                                                                                                                                                                                                                               | <b>80</b>                                                              | <b>5734</b>    | <b>439</b>     | <b>168</b>  |
| <b>066</b>                                                                                                                                                                                                                                                                                                                                                                                                                                                                                                                                                   | <b>84</b>                                                              | <b>1553</b>    | <b>175</b>     | <b>111</b>  |
| <b>072</b>                                                                                                                                                                                                                                                                                                                                                                                                                                                                                                                                                   | <b>43</b>                                                              | <b>1553</b>    | <b>217</b>     | <100        |
| <b>073</b>                                                                                                                                                                                                                                                                                                                                                                                                                                                                                                                                                   | <b>56</b>                                                              | <b>4525</b>    | <b>431</b>     | <100        |
| <b>077</b>                                                                                                                                                                                                                                                                                                                                                                                                                                                                                                                                                   | <b>68</b>                                                              | <b>4549</b>    | <b>387</b>     | <b>110</b>  |
| <b>083</b>                                                                                                                                                                                                                                                                                                                                                                                                                                                                                                                                                   | <b>67</b>                                                              | <b>1617</b>    | <b>143</b>     | <b>157</b>  |
| <b>091</b>                                                                                                                                                                                                                                                                                                                                                                                                                                                                                                                                                   | <b>56</b>                                                              | <b>1866</b>    | <b>133</b>     | <b>109</b>  |
| <b>092 wtR</b>                                                                                                                                                                                                                                                                                                                                                                                                                                                                                                                                               | <b>45</b>                                                              | <b>964</b>     | <b>120</b>     | <100        |
| <b>JRCSE</b>                                                                                                                                                                                                                                                                                                                                                                                                                                                                                                                                                 | <40                                                                    | <b>1490</b>    | <40            | <b>300</b>  |
| <b>NL43</b>                                                                                                                                                                                                                                                                                                                                                                                                                                                                                                                                                  | <b>1597</b>                                                            | <b>75</b>      | <b>66</b>      | <b>4438</b> |
| <b>aMLV</b>                                                                                                                                                                                                                                                                                                                                                                                                                                                                                                                                                  | <40                                                                    | <40            | <40            | <100        |
| <p>The neutralizing antibody titer (IC<sub>50</sub>) is defined as the reciprocal of the plasma dilution that produces a 50% inhibition in target cell infection. Values in bold represent significant neutralization titers that are at least three times greater than those observed against the negative control (aMLV). The Envs designated wildtype resistant (wtR) and wildtype sensitive (wtS) are indicated. Envs for both the wtR and wtS isolates were from CCR5-dependent viruses as determined by the Trofile® assay (Monogram Biosciences).</p> |                                                                        |                |                |             |
