# Supplementary material for: Glycans Flanking the Hypervariable Connecting Peptide between the A and B Strands of the V1/V2 Domain of HIV-1 gp120 Confer Resistance to Antibodies That Neutralize CRF01_AE Viruses
Source: PLOS journal article supplement (doi:10.1371/journal.pone.0119608), 2015-03-20
Supplement: S2 (10.1371/journal.pone.0119608.s002) [file journal.pone.0119608.s002]

| <b>Supplemental Table S2. Neutralization sensitivity of pseudovirus constructed with envelopes from subject 113035</b>                                                                                                                                                                                                                                                                                                                                                                                                                                       |                                                                        |                |                |             |
|--------------------------------------------------------------------------------------------------------------------------------------------------------------------------------------------------------------------------------------------------------------------------------------------------------------------------------------------------------------------------------------------------------------------------------------------------------------------------------------------------------------------------------------------------------------|------------------------------------------------------------------------|----------------|----------------|-------------|
|                                                                                                                                                                                                                                                                                                                                                                                                                                                                                                                                                              | <b>Neutralization titer (IC<sub>50</sub>) obtained with HIV+ serum</b> |                |                |             |
| <b>Clone / Serum</b>                                                                                                                                                                                                                                                                                                                                                                                                                                                                                                                                         | <b>T500105</b>                                                         | <b>T500107</b> | <b>T500208</b> | <b>Z23</b>  |
| <b>007 wtS</b>                                                                                                                                                                                                                                                                                                                                                                                                                                                                                                                                               | <40                                                                    | <b>616</b>     | <b>555</b>     | <b>399</b>  |
| <b>012</b>                                                                                                                                                                                                                                                                                                                                                                                                                                                                                                                                                   | <40                                                                    | <b>758</b>     | <b>110</b>     | <b>247</b>  |
| <b>020</b>                                                                                                                                                                                                                                                                                                                                                                                                                                                                                                                                                   | <b>50</b>                                                              | <b>824</b>     | <b>123</b>     | <b>386</b>  |
| <b>033</b>                                                                                                                                                                                                                                                                                                                                                                                                                                                                                                                                                   | <40                                                                    | <b>722</b>     | <b>253</b>     | <b>284</b>  |
| <b>036</b>                                                                                                                                                                                                                                                                                                                                                                                                                                                                                                                                                   | <40                                                                    | <b>623</b>     | <b>67</b>      | <b>367</b>  |
| <b>045 wtR</b>                                                                                                                                                                                                                                                                                                                                                                                                                                                                                                                                               | <40                                                                    | <b>1576</b>    | <b>70</b>      | <b>264</b>  |
| <b>051</b>                                                                                                                                                                                                                                                                                                                                                                                                                                                                                                                                                   | <40                                                                    | <b>587</b>     | <b>59</b>      | <b>276</b>  |
| <b>055</b>                                                                                                                                                                                                                                                                                                                                                                                                                                                                                                                                                   | <40                                                                    | <b>1355</b>    | <b>162</b>     | <b>306</b>  |
| <b>070</b>                                                                                                                                                                                                                                                                                                                                                                                                                                                                                                                                                   | <40                                                                    | <b>1281</b>    | <b>81</b>      | <b>246</b>  |
| <b>081</b>                                                                                                                                                                                                                                                                                                                                                                                                                                                                                                                                                   | <b>133</b>                                                             | <b>729</b>     | <b>103</b>     | <b>336</b>  |
| <b>JRCSE</b>                                                                                                                                                                                                                                                                                                                                                                                                                                                                                                                                                 | <40                                                                    | <b>2611</b>    | <40            | <b>335</b>  |
| <b>NL43</b>                                                                                                                                                                                                                                                                                                                                                                                                                                                                                                                                                  | <b>934</b>                                                             | <b>74</b>      | <b>109</b>     | <b>4852</b> |
| <b>aMLV</b>                                                                                                                                                                                                                                                                                                                                                                                                                                                                                                                                                  | <40                                                                    | <40            | <40            | <100        |
| <p>The neutralizing antibody titer (IC<sub>50</sub>) is defined as the reciprocal of the plasma dilution that produces a 50% inhibition in target cell infection. Values in bold represent significant neutralization titers that are at least three times greater than those observed against the negative control (aMLV). The Envs designated wildtype resistant (wtR) and wildtype sensitive (wtS) are indicated. Envs for both the wtR and wtS isolates were from CCR5-dependent viruses as determined by the Trofile® assay (Monogram Biosciences).</p> |                                                                        |                |                |             |
